# Supplementary material for: Effectiveness of eHealth interventions for improving medication adherence of organ transplant patients: A systematic review and meta-analysis
Source: PubMed Central journal article supplement (PMC7644069; doi:10.1371/journal.pone.0241857), 2020-11-05
Supplement: pone.0241857.s004.pdf [file pone.0241857.s004.pdf]

#### **S4 Appendix. List of studies included in the systematic review**

1. Sengpiel J, Fuehner T, Kugler C, Avsar M, Bodmann I, Boemke A, et al. Use of telehealth technology for home spirometry after lung transplantation: A randomized controlled trial. *Prog Transplant*.2010;20(4):310-7.  
<https://doi.org/10.7182/prtr.20.4.5522u13010202761> PMID: 21265282
2. Suhling H, Rademacher J, Zinowsky I, Fuge J, Greer M, Warnecke G, et al. Conventional vs. tablet computer-based patient education following lung transplantation: A randomized controlled trial. *PLoS One*.2014;9(3):e90828.  
<https://doi.org/10.1371/journal.pone.0090828> PMID: 24608864
3. DeVito Dabbs A, Song MK, Myers BA, Li R, Hawkins RP, Pilewski JM, et al. A randomized controlled trial of a mobile health intervention to promote self-management after lung transplantation. *Am J Transplant*.2016;16(7):2172-80.  
<https://doi.org/10.1111/ajt.13701> PMID: 26729617
4. Reese PP, Bloom RD, Trofe-Clark J, Mussell A, Leidy D, Levsky S, et al. Automated reminders and physician notification to promote immunosuppression adherence among kidney transplant recipients: A randomized trial. *Am J Kidney Dis*.2017;69(3):400-9.  
<https://doi.org/10.1053/j.ajkd.2016.10.017> PMID: 27940063
5. Han A, Min SI, Ahn S, Min SK, Hong HJ, Han N, et al. Mobile medication manager application to improve adherence with immunosuppressive therapy in renal transplant recipients: a randomized controlled trial. *PloS ONE*. 2019;14(11):e0224595.  
<https://doi.org/10.1371/journal.pone.0224595> PMID: 31689320
6. Harrison JJ, Badr S, Hamandi B, Kim SJ. Randomized controlled trial of a computer-based education program in the home for solid organ transplant recipients: Impact on

medication knowledge, satisfaction, and adherence. *Transplantation*. 2017;101(6):1336-43. <https://doi.org/10.1097/tp.0000000000001279> PMID: 27367473

7. McGillicuddy JW, Gregoski MJ, Weiland AK, Rock RA, Brunner-Jackson BM, Patel SK, et al. Mobile health medication adherence and blood pressure control in renal transplant recipients: a proof-of-concept randomized controlled trial. *JMIR Res Protoc*. 2013;2(2):e32. <https://doi.org/10.2196/resprot.2633> PMID: 24004517
